# Supplementary material for: Poplar flower-like nitrogen-doped carbon nanotube@VS4 composites with excellent sodium storage performance
Source: Royal Society of Chemistry journal article supplement (doi:10.1039/d0qi00985g), 2020-01-01
Supplement: d0qi00985g1.pdf [file d0qi00985g1.pdf]

## Electronic Supplementary Information

### **Poplar flower-like nitrogen-doped carbon tube @ VS<sub>4</sub> composites with excellent sodium storage performance**

Fei Yang<sup>a</sup>, Wen Zhong<sup>a</sup>, Manman Ren<sup>a,b\*</sup>, Weiliang Liu<sup>a</sup>, Mei Li<sup>a</sup>, Guangda Li<sup>a</sup>, Liwei Su<sup>c</sup>

a School of Materials Science and Engineering, Qilu University of Technology (Shandong Academy of Sciences), Jinan 250353, PR China

b Key Laboratory of Advanced Energy Materials Chemistry (Ministry of Education), College of Chemistry, Nankai University, Tianjin 300071, China

c State Key Laboratory Breeding Base of Green Chemistry-Synthesis Technology, College of Chemical Engineering, Zhejiang University of Technology, Hangzhou 310014, PR China

\* Email: renmanman@qlu.edu.cn

## Supplementary Figures

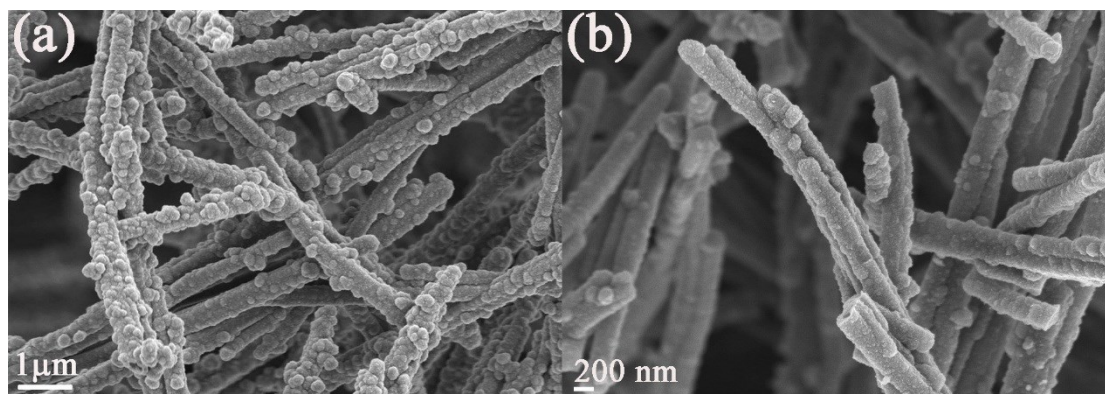

Fig. S1. SEM images of the NCNt.

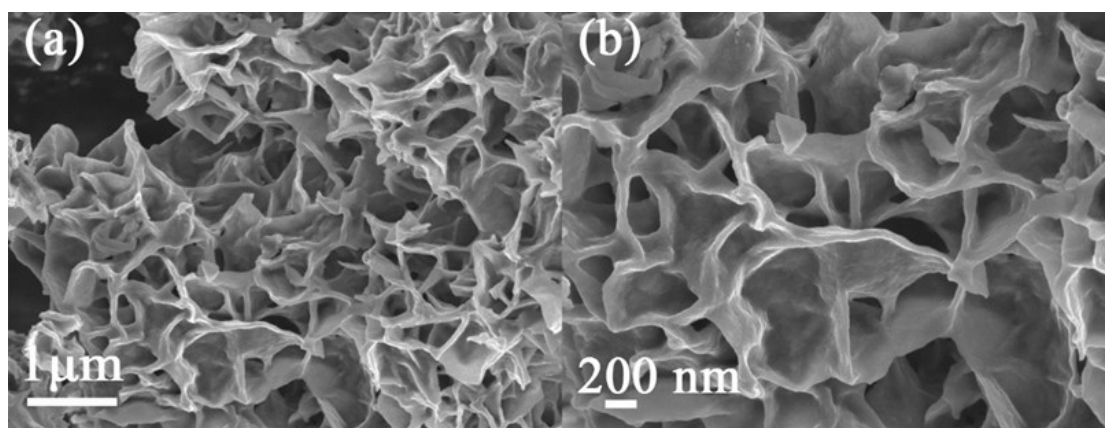

Fig. S2 SEM images of the pure VS<sub>4</sub> sample.

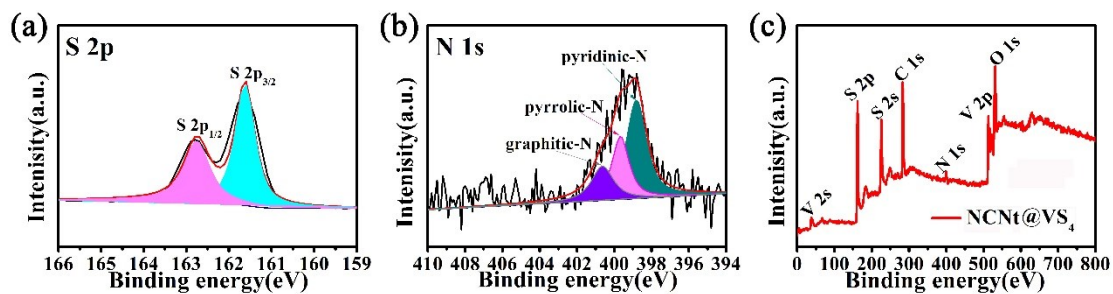

Fig. S3 (a) S 2p, (b) N 1s XPS spectra and (c) Survey XPS spectra of the NCNt@VS<sub>4</sub> sample.

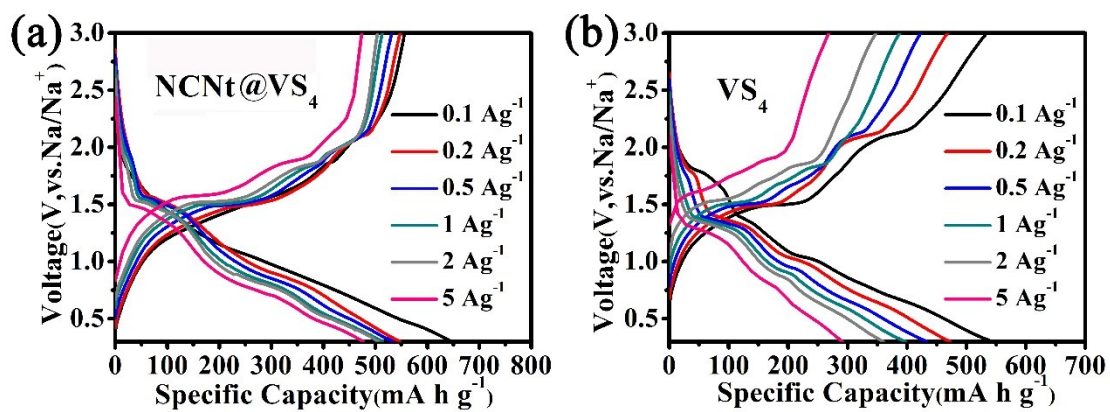

Fig. S4 Charge/discharge profiles of (a) the NCNt@VS<sub>4</sub> and (b) VS<sub>4</sub> electrode at different current densities.

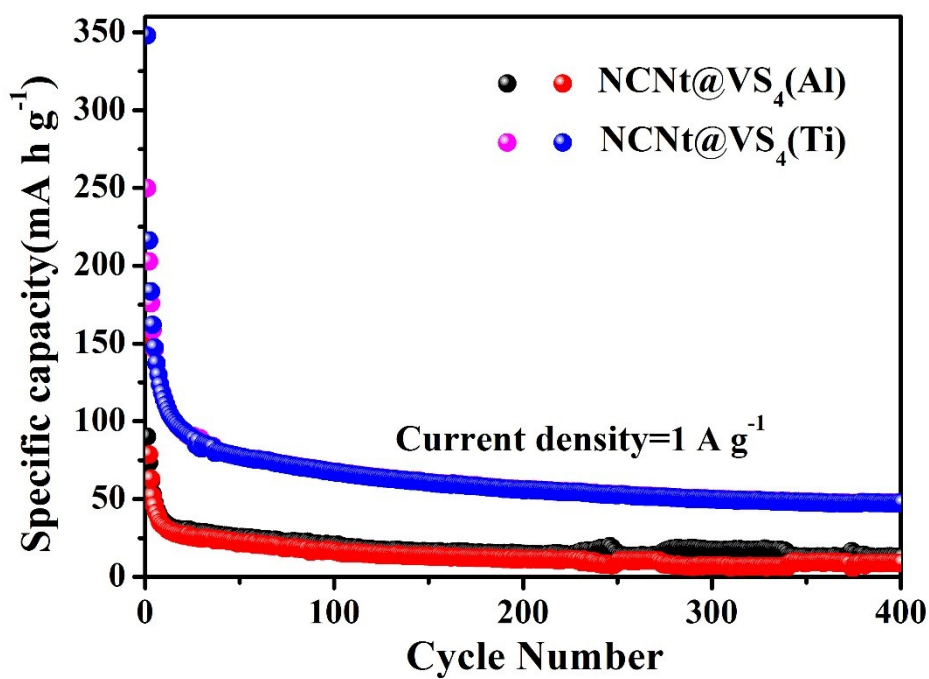

Fig. S5 The sodium storage performance of the nitrogen-doped carbon nanotube@VS<sub>4</sub> composite using Al and Ti foil as current collectors.

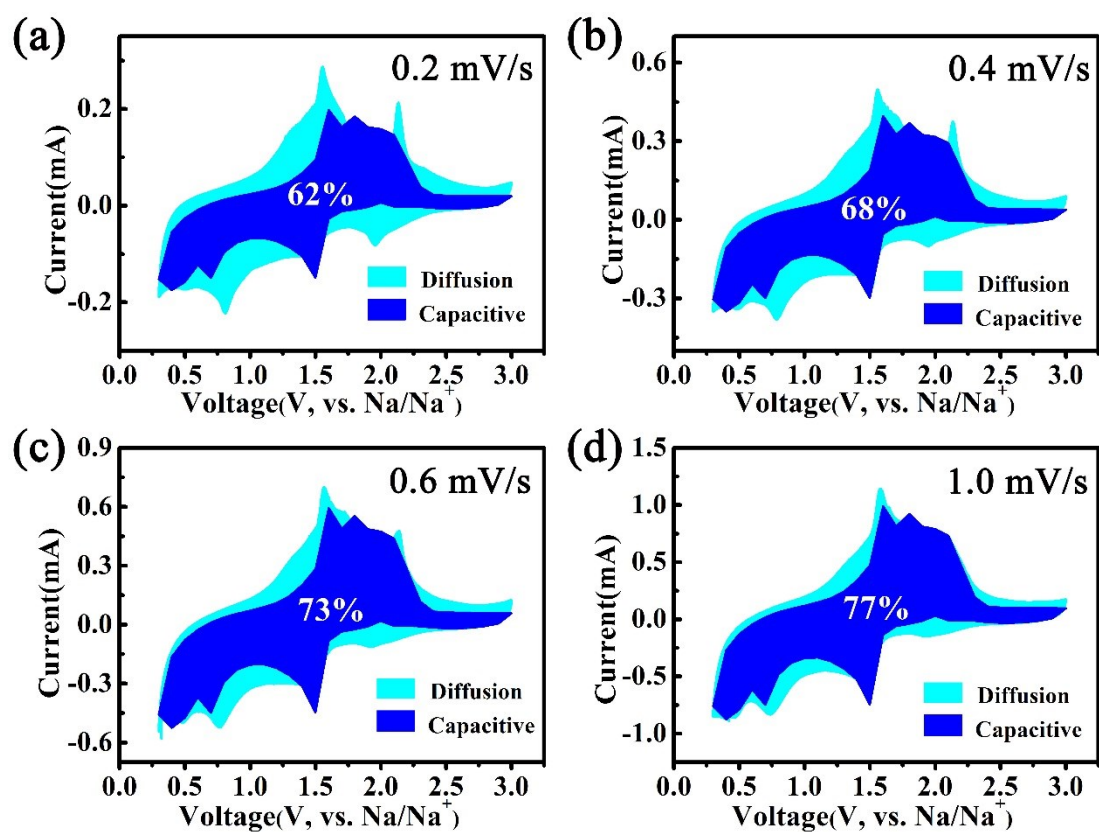

Fig. S6 Capacitive contribution at (a) 0.2 mV s<sup>-1</sup>; (b) 0.4 mV s<sup>-1</sup>; (c) 0.6 mV s<sup>-1</sup>; (d) 1.0 mV s<sup>-1</sup> for NCNT@VS<sub>4</sub> electrode.
